# Supplementary material for: DNA methylation associates with survival in non-metastatic clear cell renal cell carcinoma
Source: Springer Nature journal article supplement (doi:10.1186/s12885-019-5291-3), 2019-01-14
Supplement: MOESM1 [file 16396346]

## Additional Table 1

| <b>Filtration steps</b>                                                                          | <b>Unique CpGs</b> | <b>Unique genes</b> |
|--------------------------------------------------------------------------------------------------|--------------------|---------------------|
| 1. Annotation (updated)                                                                          | 483214             | 20972               |
| 2. Excluding of chr X and Y                                                                      | 471657             | 20022               |
| 3. Excluding CpGs less than 3 bp from a snp, multi-hit                                           | 433954             | 19799               |
| 4. Excluding CpGs with a detection p-value greater than 0.05 or less than 3 nbeads in any sample | 396543             | 19758               |
| 4. Excluding CpGs located outside promoter region                                                | 155931             | 19385               |
