# Supplementary material for: DNA methylation associates with survival in non-metastatic clear cell renal cell carcinoma
Source: Springer Nature journal article supplement (doi:10.1186/s12885-019-5291-3), 2019-01-14
Supplement: MOESM2 [file 16396346]

**Additional Table 3**

| <b>Genetic aberration</b> | <b>Percentage of tumors (n=115 ccRCC)</b> | <b>Minimum Region</b>     |
|---------------------------|-------------------------------------------|---------------------------|
| 1p, loss                  | 32                                        | 23,334,666 – 32,100,024   |
| 3p, loss                  | 84                                        | tel – 46,765,401          |
| 3q, loss                  | 25                                        | cen – 97,267,562          |
| 5q, gain                  | 53                                        | 172,012,494 – tel         |
| 6q, loss                  | 15                                        | 152,878,353 – tel         |
| 7p, gain                  | 23                                        | Whole arm                 |
| 7q, gain                  | 22                                        | Whole arm                 |
| 8p, loss                  | 30                                        | 12,653,559 – 27,797,474   |
| 9p, loss                  | 37                                        | tel – 28,013,465          |
| 9q, loss                  | 35                                        | 130,719,998 – 138,443,132 |
| 10q, loss                 | 25                                        | 85,932,576 – 90,524,678   |
| 14q, loss                 | 37                                        | 69,560,017 – 91,189,113   |
