# Supplementary material for: DNA methylation associates with survival in non-metastatic clear cell renal cell carcinoma
Source: Springer Nature journal article supplement (doi:10.1186/s12885-019-5291-3), 2019-01-14
Supplement: MOESM4 [file 16396346]

**Additional Table 2**

|                                                       |           | SNP analysis (n = 57)<br>HumanCytoSNP-12 v2.1 |           |               |                      |         |
|-------------------------------------------------------|-----------|-----------------------------------------------|-----------|---------------|----------------------|---------|
|                                                       |           | WT                                            | Loss/Gain | Cohen's kappa | p-value <sup>1</sup> |         |
| SNP analysis (n = 57)<br>HumanMethylation450 BeadChip | <b>1p</b> | WT                                            | 36        | 5             | 0.458                | 0.001   |
|                                                       | Loss      | 7                                             | 9         |               |                      |         |
|                                                       | <b>3p</b> | WT                                            | 5         | 4             | 0.516                | < 0.001 |
|                                                       | Loss      | 3                                             | 45        |               |                      |         |
|                                                       | <b>3q</b> | WT                                            | 41        | 2             | 0.811                | < 0.001 |
|                                                       | Loss      | 2                                             | 12        |               |                      |         |
|                                                       | <b>5q</b> | WT                                            | 24        | 2             | 0.687                | < 0.001 |
|                                                       | Gain      | 7                                             | 24        |               |                      |         |
|                                                       | <b>6q</b> | WT                                            | 39        | 7             | 0.568                | < 0.001 |
|                                                       | Loss      | 2                                             | 9         |               |                      |         |
|                                                       | <b>7p</b> | WT                                            | 40        | 4             | 0.539                | < 0.001 |
|                                                       | Gain      | 5                                             | 8         |               |                      |         |
|                                                       | <b>7q</b> | WT                                            | 39        | 6             | 0.503                | 0.001   |
|                                                       | Gain      | 4                                             | 8         |               |                      |         |
|                                                       | <b>8p</b> | WT                                            | 34        | 3             | 0.504                | < 0.001 |
|                                                       | Loss      | 9                                             | 11        |               |                      |         |
| <b>9p</b>                                             | WT        | 35                                            | 1         | 0.679         | < 0.001              |         |
| Loss                                                  | 7         | 14                                            |           |               |                      |         |
| <b>9q</b>                                             | WT        | 33                                            | 3         | 0.607         | < 0.001              |         |
| Loss                                                  | 7         | 14                                            |           |               |                      |         |
| <b>10q</b>                                            | WT        | 39                                            | 3         | 0.565         | < 0.001              |         |
| Loss                                                  | 6         | 9                                             |           |               |                      |         |
| <b>14q</b>                                            | WT        | 28                                            | 6         | 0.641         | < 0.001              |         |
| Loss                                                  | 4         | 19                                            |           |               |                      |         |

1 – Cohen's Kappa Test
