# Supplementary material for: DNA methylation associates with survival in non-metastatic clear cell renal cell carcinoma
Source: Springer Nature journal article supplement (doi:10.1186/s12885-019-5291-3), 2019-01-14
Supplement: MOESM7 [file 16396346]

**Additional Table 8.**

| Geneset<br>Hypermethylated | Description                                                                            | P-value     | GeneIDs                                                                      |
|----------------------------|----------------------------------------------------------------------------------------|-------------|------------------------------------------------------------------------------|
| GO:0050954                 | sensory perception of mechanical stimulus                                              | 0.000213929 | 40;491;3784;5077;9311;89797                                                  |
| GO:0010991                 | negative regulation of SMAD protein complex assembly                                   | 0.000335484 | 4091;57057                                                                   |
| GO:0021563                 | glossopharyngeal nerve development                                                     | 0.000335484 | 3213;89797                                                                   |
| GO:0050915                 | sensory perception of sour taste                                                       | 0.000335484 | 40;9311                                                                      |
| GO:0050974                 | detection of mechanical stimulus involved in sensory perception                        | 0.000359707 | 40;491;9311                                                                  |
| GO:0010990                 | regulation of SMAD protein complex assembly                                            | 0.000501309 | 4091;57057                                                                   |
| GO:1903025                 | regulation of RNA polymerase II regulatory region sequence-specific DNA binding        | 0.000699158 | 1649;64324                                                                   |
| GO:0044058                 | regulation of digestive system process                                                 | 0.000933445 | 2693;3784;4986                                                               |
| GO:0007605                 | sensory perception of sound                                                            | 0.001061258 | 40;491;3784;5077;89797                                                       |
| GO:0015871                 | choline transport                                                                      | 0.001189446 | 6397;80736                                                                   |
| GO:0061061                 | muscle structure development                                                           | 0.001256607 | 1649;5077;7134;8470;30812;57057;84466;140578;150921;284358                   |
| GO:0009268                 | response to pH                                                                         | 0.001524463 | 40;3373;9311                                                                 |
| GO:0050982                 | detection of mechanical stimulus                                                       | 0.001763248 | 40;491;9311                                                                  |
| GO:0001976                 | neurological system process involved in regulation of systemic arterial blood pressure | 0.001803409 | 40;89797                                                                     |
| GO:0003177                 | pulmonary valve development                                                            | 0.002155863 | 4091;57057                                                                   |
| GO:0003184                 | pulmonary valve morphogenesis                                                          | 0.002155863 | 4091;57057                                                                   |
| GO:0007183                 | SMAD protein complex assembly                                                          | 0.002949933 | 4091;57057                                                                   |
| GO:0007517                 | muscle organ development                                                               | 0.003319831 | 5077;7134;30812;57057;84466;140578;150921                                    |
| GO:2000251                 | positive regulation of actin cytoskeleton reorganization                               | 0.003390845 | 2242;3055                                                                    |
| GO:0072523                 | purine-containing compound catabolic process                                           | 0.003684015 | 5143;50940;51816                                                             |
| Geneset<br>Hypomethylated  | Description                                                                            | P-value     | GeneIDs                                                                      |
| GO:0009605                 | response to external stimulus                                                          | 1.38E-05    | 301;302;375;841;1235;1437;2865;3428;3553;4353;4600;5337;5723;6590;9021;90678 |
| GO:0006952                 | defense response                                                                       | 2.72E-05    | 301;375;841;1235;2865;3428;3553;4261;4353;4600;6590;9021;90678               |
| GO:0006955                 | immune response                                                                        | 3.33E-05    | 301;841;1235;1437;2865;3428;3553;4261;4600;6590;8530;9021;9404               |
| GO:1901700                 | response to oxygen-containing compound                                                 | 5.24E-05    | 301;535;841;1437;2788;2865;3553;4353;5723;6590;9021;23175;23209              |
| GO:0010638                 | positive regulation of organelle organization                                          | 5.93E-05    | 301;302;375;841;908;1437;3553;90678                                          |
| GO:0043434                 | response to peptide hormone                                                            | 6.53E-05    | 301;535;2788;2865;3553;9021;23175                                            |
| GO:0051707                 | response to other organism                                                             | 9.31E-05    | 375;841;1437;3428;3553;4353;4600;6590;90678                                  |
| GO:0043207                 | response to external biotic stimulus                                                   | 9.41E-05    | 375;841;1437;3428;3553;4353;4600;6590;90678                                  |
| GO:0071375                 | cellular response to peptide hormone stimulus                                          | 0.000107867 | 535;2788;2865;3553;9021;23175                                                |
| GO:1901701                 | cellular response to oxygen-containing compound                                        | 0.000110827 | 301;535;1437;2788;2865;3553;4353;9021;23175;23209                            |
| GO:1901652                 | response to peptide                                                                    | 0.000119627 | 301;535;2788;2865;3553;9021;23175                                            |
| GO:0032869                 | cellular response to insulin stimulus                                                  | 0.000130264 | 535;2865;3553;9021;23175                                                     |
| GO:0009607                 | response to biotic stimulus                                                            | 0.000138233 | 375;841;1437;3428;3553;4353;4600;6590;90678                                  |
| GO:1901653                 | cellular response to peptide                                                           | 0.000154636 | 535;2788;2865;3553;9021;23175                                                |
| GO:0031340                 | positive regulation of vesicle fusion                                                  | 0.000154844 | 301;302                                                                      |
| GO:0043086                 | negative regulation of catalytic activity                                              | 0.000176425 | 301;302;841;3428;3553;6590;8530;9021;200734                                  |
| GO:0031347                 | regulation of defense response                                                         | 0.000205757 | 301;375;841;2865;3428;3553;9021;90678                                        |
| GO:0002252                 | immune effector process                                                                | 0.000208099 | 301;375;1235;2865;3428;3553;4353;4600                                        |
| GO:0080134                 | regulation of response to stress                                                       | 0.00029618  | 301;302;375;841;2865;3428;3553;9021;23209;90678;200734                       |
| GO:0033993                 | response to lipid                                                                      | 0.000315059 | 301;841;1437;2865;3553;4353;5723;6590;23209                                  |
