# Supplementary material for: DNA methylation associates with survival in non-metastatic clear cell renal cell carcinoma
Source: Springer Nature journal article supplement (doi:10.1186/s12885-019-5291-3), 2019-01-14
Supplement: MOESM8 [file 16396346]

**Additional Table 4**

| Variables           |         | Hazard Ratio | Hazard Ratio (95 % CI) | <i>p-value</i> |
|---------------------|---------|--------------|------------------------|----------------|
| Age                 |         | 0.864        | 0.955 – 1.017          | <i>0.353</i>   |
| Gender              | Female  |              | Ref.                   | <i>0.029</i>   |
|                     | Male    | 2.220        | 1.087 – 4.533          |                |
| TNM stage           | I       |              | Ref.                   | <i>0.622</i>   |
|                     | II      | 1.512        | 0.292 – 7.816          |                |
|                     | III     | 6.921        | 2.284 – 20.970         |                |
|                     | IV      | 33.868       | 11.158 – 102.805       |                |
| Morphological grade | G1 + G2 |              | Ref.                   | <i>0.001</i>   |
|                     | G3 + G4 | 4.014        | 1.823 – 8.840          |                |
| Cluster Status      | A       |              | Ref.                   | <i>0.982</i>   |
|                     | B       | 1.009        | 0.474 – 2.072          |                |
