# Supplementary material for: DNA methylation associates with survival in non-metastatic clear cell renal cell carcinoma
Source: Springer Nature journal article supplement (doi:10.1186/s12885-019-5291-3), 2019-01-14
Supplement: MOESM9 [file 16396346]

**Additional Table 5**

| <b>Variables</b>    |        | <b>Hazard Ratio</b> | <b>Hazard Ratio (95 % CI)</b> | <b><i>p-value</i></b> |
|---------------------|--------|---------------------|-------------------------------|-----------------------|
| Age                 |        | 0.970               | 0.929 – 1.013                 | <i>0.165</i>          |
| Gender              | Female |                     | Ref.                          | <i>0.212</i>          |
|                     | Male   | 0.212               | 0.722 – 4.319                 |                       |
| TNM stage           | I      |                     | Ref.                          | <i>0.399</i>          |
|                     | II     | 1.801               | 0.458 – 7.079                 |                       |
|                     | III    | 4.985               | 1.579 – 15.738                |                       |
| Morphological grade | G1     |                     | Ref.                          | <i>0.542</i>          |
|                     | G2     | 1.634               | 0.337 – 7.928                 |                       |
|                     | G3     | 3.427               | 0.553 – 21.227                |                       |
|                     | G4     | 7.139               | 1.047 – 48.653                |                       |
| Cluster Status      | A      |                     | Ref.                          | <i>0.610</i>          |
|                     | B      | 0.610               | 0.210 – 2.498                 |                       |
