# Supplementary material for: DNA methylation associates with survival in non-metastatic clear cell renal cell carcinoma
Source: Springer Nature journal article supplement (doi:10.1186/s12885-019-5291-3), 2019-01-14

**Additional Figure 5**

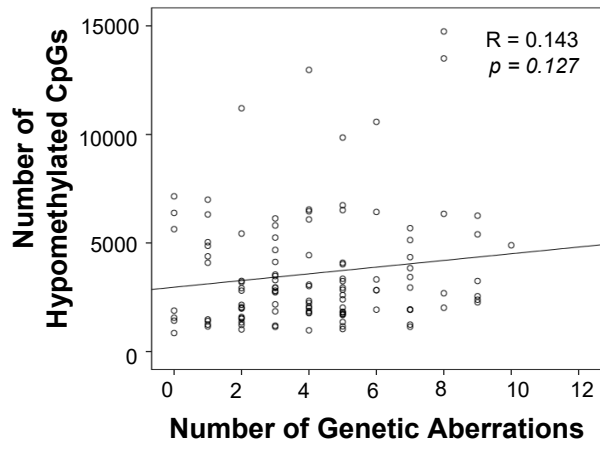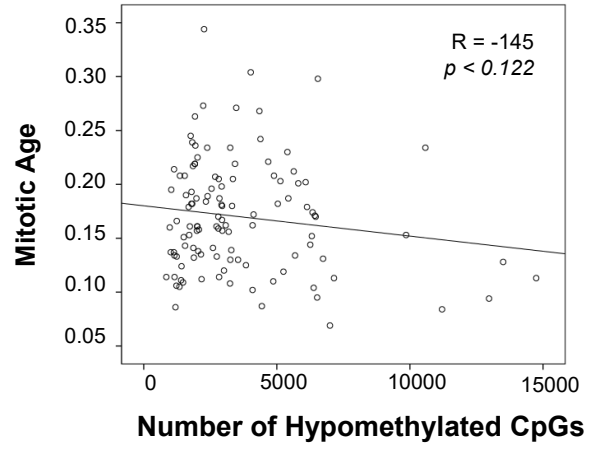

Supplement: MOESM11 [file 16396346]
