# Supplementary material for: DNA methylation associates with survival in non-metastatic clear cell renal cell carcinoma
Source: Springer Nature journal article supplement (doi:10.1186/s12885-019-5291-3), 2019-01-14
Supplement: MOESM12 [file 16396346]

**Additional Table 6**

| Patient | Diameter (mm) | Grade | T-stage | M-stage | TNM |
|---------|---------------|-------|---------|---------|-----|
| 1       | 43            | 2     | T1b     | M0      | I   |
| 2       | 50            | 3     | T1b     | M0      | I   |
| 4       | 55            | 2     | T1b     | M0      | I   |
| 5       | 50            | 2     | T1b     | M0      | I   |
| 6       | 85            | 2     | T2      | M0      | II  |
