# Supplementary material for: DNA methylation associates with survival in non-metastatic clear cell renal cell carcinoma
Source: Springer Nature journal article supplement (doi:10.1186/s12885-019-5291-3), 2019-01-14
Supplement: MOESM13 [file 16396346]

**Additional Table 7.**

| <b>Variables</b>    |        | <b>Hazard Ratio</b> | <b>Hazard Ratio (95 % CI)</b> | <b><i>p-value</i></b> |              |
|---------------------|--------|---------------------|-------------------------------|-----------------------|--------------|
| Age                 |        | 0.956               | 0.914 – 1.001                 | <i>0.056</i>          |              |
| Gender              | Female |                     | Ref.                          | <i>0.181</i>          |              |
|                     | Male   | 1.621               | 0.676 – 3.884                 |                       |              |
| TNM stage           | I      |                     | Ref.                          | <i>0.368</i>          |              |
|                     | II     | 1.893               | 0.472 – 7.602                 |                       |              |
|                     | III    | 3.890               | 1.376 – 10.998                |                       | <i>0.010</i> |
| Morphological grade | G1     |                     | Ref.                          | <i>0.952</i>          |              |
|                     | G2     | 0.950               | 0.179 – 5.026                 |                       |              |
|                     | G3     | 1.967               | 0.337 – 11.474                |                       | <i>0.452</i> |
|                     | G4     | 5.314               | 0.826 – 34.194                |                       | <i>0.079</i> |
| PMC                 | Low    |                     | Ref.                          | <i>0.019</i>          |              |
|                     | High   | 4.409               | 1.281 – 15.819                |                       |              |
